# Supplementary material
Source: PubMed Central journal article supplement (PMC1681519)
Supplement: msb4100089-s1.pdf [file msb4100089-s1.pdf]

# Supplementary Information

## Principles of microRNA regulation of a human cellular signaling network

Qinghua Cui<sup>1+</sup>, Zhenbao Yu<sup>2+</sup>, Enrico O. Purisima<sup>1</sup>, and Edwin Wang<sup>1\*</sup>

<sup>1</sup>*Computational Chemistry & Biology Group and* <sup>2</sup>*Mammalian Cell Genetics Group, Biotechnology Research Institute, National Research Council Canada, Montreal, Quebec, H4P 2R2, Canada*

<sup>+</sup>These authors contributed equally to this work

<sup>\*</sup>To whom correspondence should be addressed. Email: [edwin.wang@cnrc-nrc.gc.ca](mailto:edwin.wang@cnrc-nrc.gc.ca)

## **Table of Contents**

**Supplementary Text**

**Supplementary Discussion**

**Supplementary Figures**

**Supplementary Tables**

**List of supporting data files and Java source code files**

(All data and Java source code files can be downloaded at <http://www.bri.nrc.ca/wang/mirna2.html>)

**Supplementary Reference List**

## Supplementary Text

### **Genome-wide analysis of miRNA target abundance of ligands, receptors and transcription factors**

We extracted all the ligands from human genome using a NCBI gene information file (<ftp://ftp.ncbi.nlm.nih.gov/gene/DATA/>) and obtained 94 ligands (Supplementary Text file 17). We extracted all the receptors from human genome based on Gene Ontology (GO) terms (<ftp://ftp.ncbi.nlm.nih.gov/gene/DATA/>) and obtained 1,511 receptors (Supplementary Text file 18). We obtained 1,795 transcription factors (TFs, Supplementary Text file 19) from human genome using the file downloaded from the paper published by Messina et al. [Messina et al., 2004]. We found that miRNA targets are significantly enriched in the TFs of the genome (35.7%, 629/1795,  $P < 2 \times 10^{-4}$ ). To identify human signaling TFs, we intersected the 1,795 TFs and a comprehensive manually curated human signaling pathway dataset (Supplementary Text file 20). Here we defined the TFs that are documented as components of signaling pathways as signaling TFs. To generate Supplementary Text file 20, we downloaded a file containing manually curated pathway proteins from a recent report [Subramanian et al., 2005]. Since this dataset contains many other pathways, such as metabolic pathways, we manually checked to keep the signaling pathway proteins only and removed other types of pathway proteins. We extracted TFs (Supplementary Text file 21) and intracellular signaling proteins (Supplementary Text file 22) from Supplementary Text file 20. The TFs found in Supplementary Text file 20 are considered as signaling TFs. We mapped miRNA targets to these ligands, receptors, intracellular signaling proteins and signaling TFs and

calculated the fractions of miRNA targets in each group (Supplementary Text files 17, 18, 22, 23).

We found that miRNA targets represent 9.6%, 19.1% and 52.5% of ligands, receptors and signaling TFs, respectively ( $P < 2 \times 10^{-4}$ ). These results are similar to those found in the network. The finding of the high abundance of miRNA targets in signaling TFs triggered us to ask if miRNAs more frequently target signaling TFs than other TFs. To answer this question, we mapped miRNA targets onto the 276 signaling TFs and the total TFs. We found that the abundance of miRNA targets in signaling TFs (52.5%) is 1.5 times more than that in the total TFs (35.7%,  $P < 2 \times 10^{-4}$ ). This result suggests that miRNAs preferentially regulate signaling TFs over other TFs. Signaling TFs are important in responding to extracellular signals and play a vital role in cellular phenotypic changes. Therefore, tight regulation of signaling TFs by miRNAs may facilitate more robust signal transitions.

### **Network themes formed from the network motifs regulated by a single miRNA**

To find network themes that are regulated by a single miRNA, we collected the network motifs that contain at least one target of the miRNA and examined whether these motifs could aggregate into clusters using Pajek software (<http://vlado.fmf.uni-lj.si/pub/networks/pajek/>). Supplementary Text file 24 summarized the number and size of themes regulated by each miRNA. In general, the network motifs regulated by each miRNA formed 1 or 2 network themes. The sizes of the network themes range from 4 to 145 nodes. Most of network themes contain more than 20 nodes. For example, the motifs

that contain the targets of miR-1 form a single theme with 111 nodes (Supplementary Figure 3)

In the network, there are five output cellular machines: transcription machinery, translation machinery, secretion apparatus, motility machinery and electrical response. Each cellular machine contains 12 to 38 output nodes. Since network themes can be tied to specific biological processes [Zhang et al., 2005], we attempted to associate the network themes that are regulated by each miRNA to the output cellular machines of the signaling network. Toward this end, we first identified the overlapping nodes between each cellular machine and the network themes that are regulated by each miRNA. We then calculated of the percentage of the overlapping nodes to each cellular machine. The associations between cellular machines and the network themes regulated by a single miRNA are presented by these percentages. The statistical significance of the associations is inferred by randomization tests. We defined the test is to be statistically significant, when a P value is less or equal to 0.10. The results are summarized in Supplementary Text file 25. Nearly 60% of miRNAs in this study could associate with one or more cellular machines of the signaling network. We further constructed a “heatmap” to represent the associations between the network themes that are regulated by each miRNA and the cellular machines of the signaling outputs (Supplementary Figure 4). These results also infer associations between miRNAs and signaling cellular machines.

### **Sensitivity analysis**

As approximately 12% of the predicted miRNA targets might not be real targets, we analyzed the potential effects of false positives and false negatives on the observations. To examine the effects of false positives, we randomly added 10% and 20% of the network proteins that are not predicted miRNA targets to the miRNA target list and performed the same analyses. To examine the effects of false negatives, we randomly removed 10% and 20% of the miRNA targets and performed the same analyses. The results show that, in general, the trends remained unchanged by the addition of either false positives or false negatives (Supplementary Tables IV, V, VI, VII). Except for the miRNA target fraction in the downstream components of adaptors, in which the P value remained significant when adding 10% of false positives ( $P = 0.042$ ), but changed to 0.149 when adding 20% of false positives (Supplementary Table V), the P values remained significant for all other observations when adding 20% of false positives (Supplementary Tables IV, VI, VII). For example, addition of 20% of false positives caused an increase of the fraction of miRNA targets in the whole network from 29.4% to 35.4% and meanwhile an increase of the fraction of miRNA targets of the ligands and the nuclear signaling proteins from 9.1% to 15.2% and from 50.0% to 52.6%, respectively (Supplementary Table IV). Similarly, addition of false negatives did not have obvious effect on the observations and the P values remained significant (Supplementary Tables IV, V, VI and VII). Therefore, the observations are robust against substantial errors.

## **Supplementary Discussion**

### **MiRNA regulation of signaling information flow**

The extent and duration of activation of a given signaling process may determine if a cell maintains homeostatic behavior or undergoes cell phenotypic and state changes. To maintain tolerance and homeostasis, mammalian cells have the capability to filter out noisy stimuli from extracellular environments and precisely terminate on-going cellular signaling through negative regulation of signal transduction. To efficiently avoid unwanted and auto-activation of cell surface receptors, negative regulatory signaling events selectively occur in the vicinity of the plasma membrane (the upstream region of a signaling network). Indeed, previous work indicated that negative feedback loops are abundant in the upstream section of the signaling pathways, and with positive feedback loops becoming more abundant as the signal progresses along the information flow [Ma'ayan et al., 2005]. This indicates that the early steps of the information flows may have built-in controls to limit signal propagation. Therefore, weak or short-lived signals (noise) may not penetrate into the network because of the early barrier posed by the abundance of negative feedback loops. Cellular signaling can be also suppressed by down-regulation of the concentration of signaling components, for example, by miRNAs. The fact that miRNA targets are enriched in the later steps and negative feedback loops are enriched in the early steps of the signaling information flows indicates that the role of the negative regulation of intracellular signaling by miRNAs is different from that by network inhibitory links. One of the main functions of network inhibitory links is to maintain cell tolerance to noisy extracellular stimuli and spontaneous auto-activation by blocking the signaling in the upstream of the network, whereas the main function of miRNAs is probably to maintain cell homeostasis through terminating on-going signaling at the downstream and the late stages of signaling information flows.

## Supplementary Figures

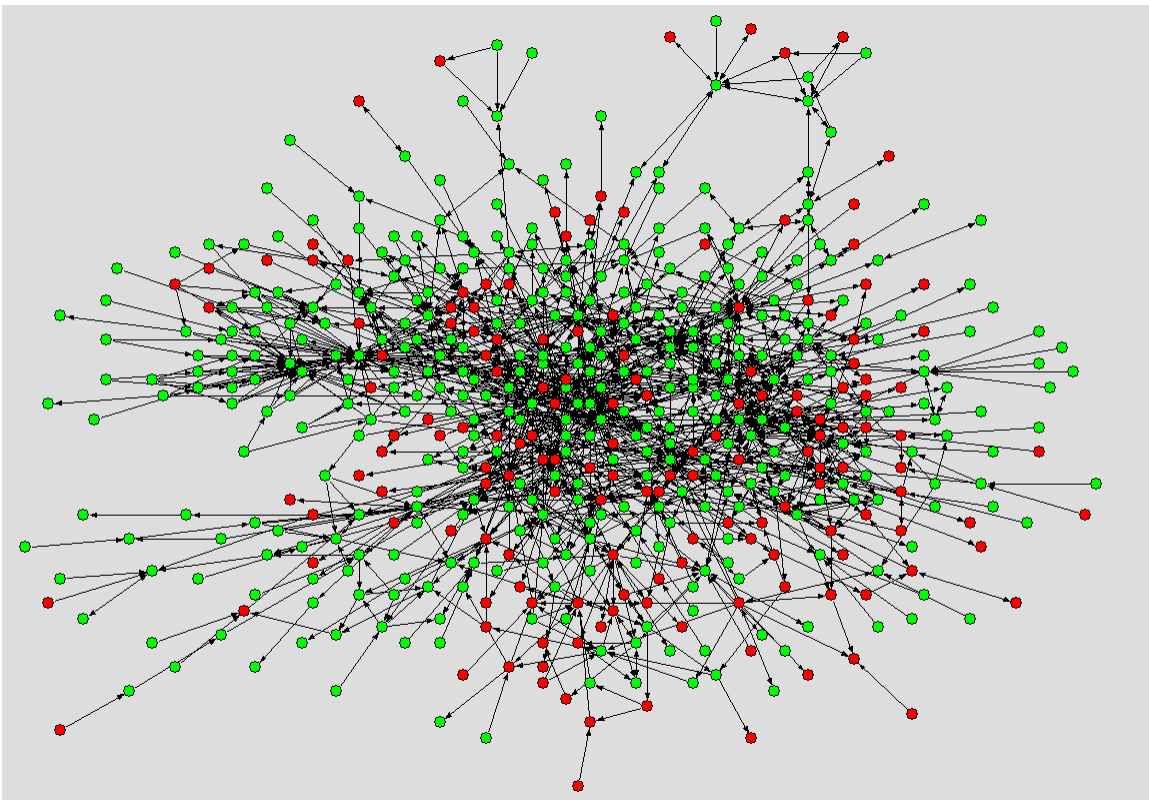

**Supplementary Figure 1 Visualization of the signaling network using the Pajek software.** The network is visualized by placing nodes as different colors based on whether they are miRNA targets. Red nodes represent miRNA targets and green nodes are not miRNA targets.



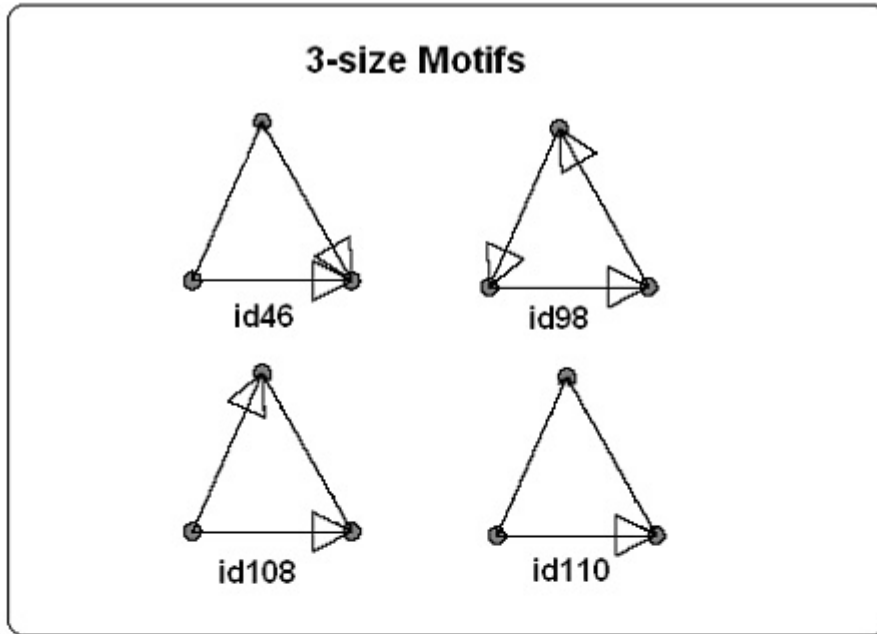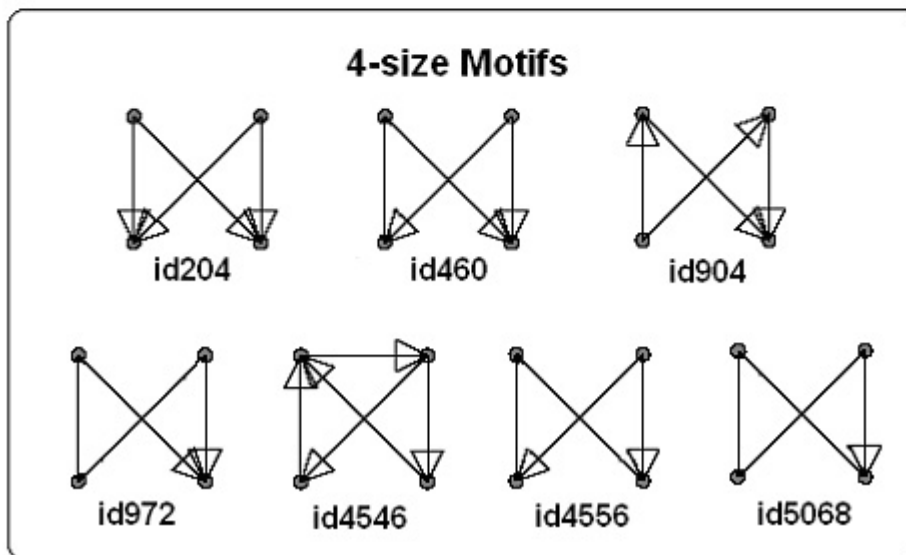

**Supplementary Figure 2 Schematic diagram of the motifs identified within the signaling network.** Network motifs were identified using Mfinder program. The number under each motif is the motif ID number of the corresponding motif. Non-directional links represent neutral links and directional links represent positive links or negative links. The network motif ID numbering system is from Alon's motif dictionary (<http://www.weizmann.ac.il/mcb/UriAlon/NetworkMotifsSW/mfinder/motifDictionary.pdf>).

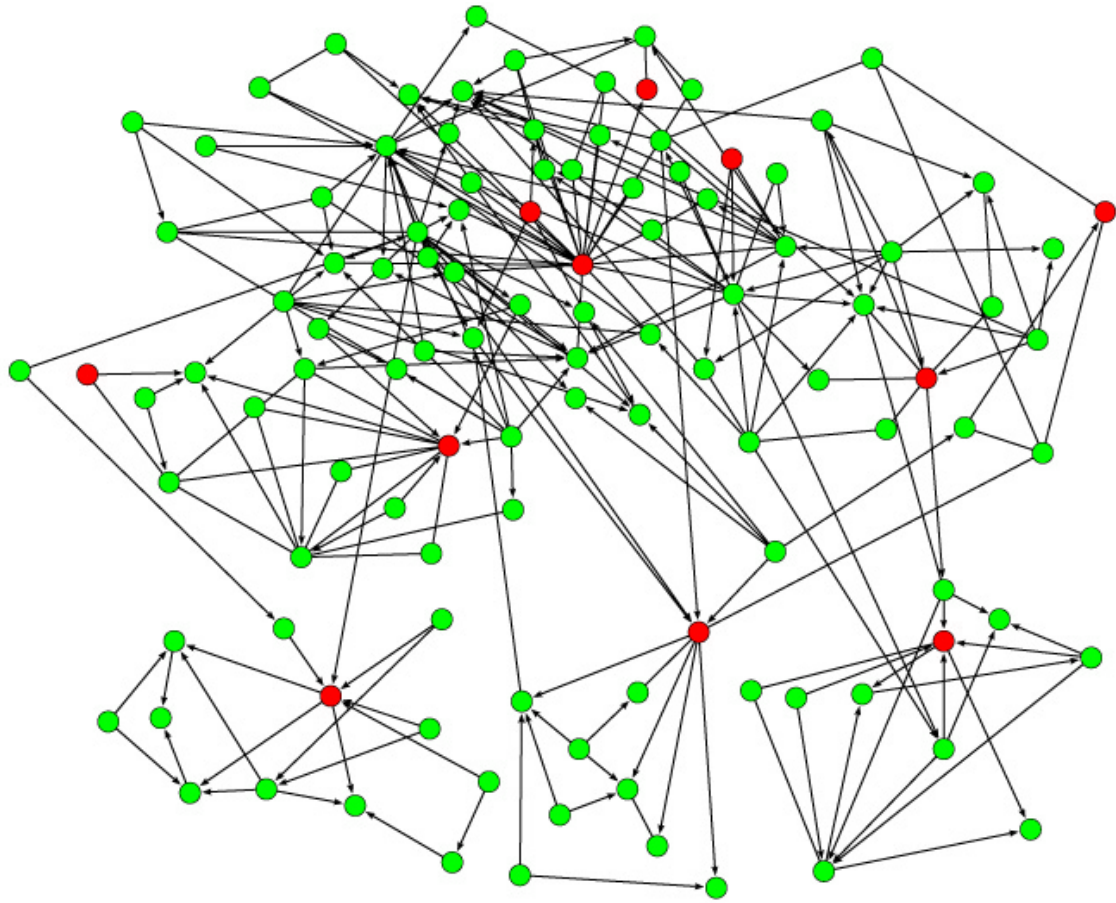

**Supplementary Figure 3** An example of network theme formed from all of the motifs containing the targets of a miRNA, miR-1. This theme is composed of 111 network components. The red nodes are miRNA targets.

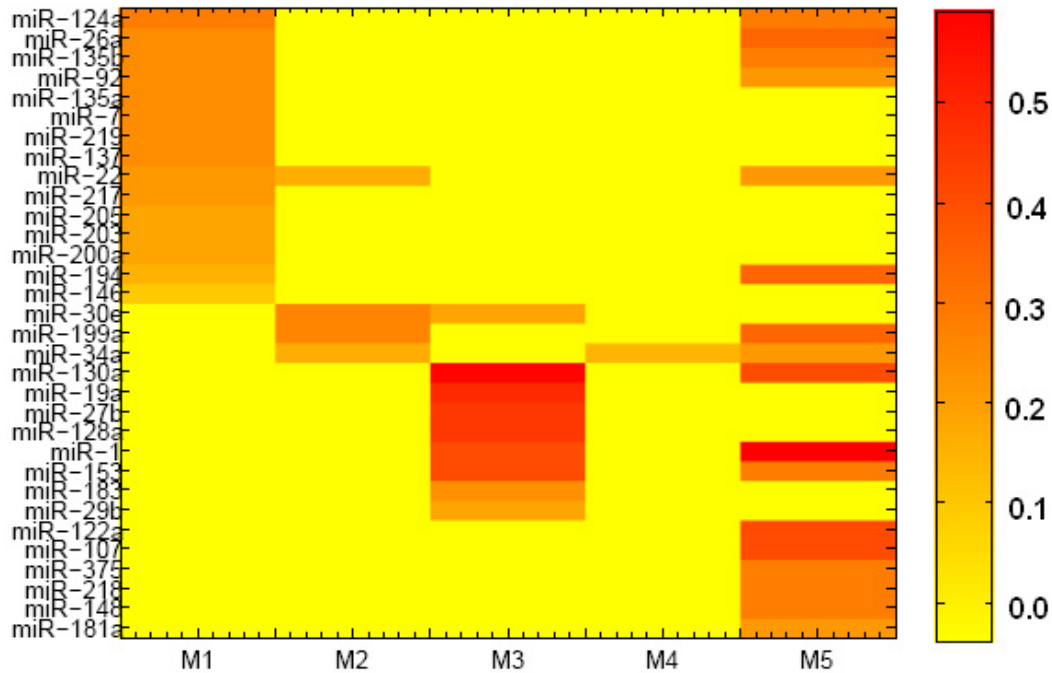

**Supplementary Figure 4 A heatmap illustrating the associations between cellular machines and the network themes regulated by each miRNA.** Rows represent miRNAs while columns represent signaling cellular machines: M1 (Transcription), M2 (Translation), M3 (Secretion apparatus), M4 (Motility), and M5 (Electrical response). To associate the network themes regulated by a single miRNA to cellular machines, we first identified the overlapping nodes between each cellular machine and the network themes that are regulated by the miRNA. The associations are presented by the percentage of the overlapping nodes to the output nodes of each cellular machine. The statistical significance of the associations is inferred by randomization tests. We defined the test is to be statistically significant, when a P value is less or equal to 0.10. A darker color represents a higher degree of association.

## Supplementary Tables

**Supplementary Table I Abundances of miRNA targets in the upstream components of high- and low-link adaptors**

|                        | <b>Number of upstream components</b> | <b>Number of miRNA targets</b> | <b>Fraction of miRNA targets</b> | <b>P value</b> |
|------------------------|--------------------------------------|--------------------------------|----------------------------------|----------------|
| <b>High-link group</b> | 84                                   | 26                             | 31.0%                            | 0.33           |
| <b>Low-link group</b>  | 76                                   | 26                             | 34.2%                            |                |

Note: High-link group contains adaptors linking to more than four upstream components, while low-link group contains adaptors linking to four or less upstream components.

**Supplementary Table II MiRNA-targeted scaffold proteins in the motif id110**

| <b>Scaffold protein</b> | <b>miRNAs</b>                                     |
|-------------------------|---------------------------------------------------|
| <b>CRK</b>              | miR-1, miR-10a, miR-126, miR-133a, miR-20, miR-93 |
| <b>PSD95</b>            | miR-1, miR-107, miR-122a                          |
| <b>SAM68</b>            | miR-122a, miR-203, miR-204, miR-218               |
| <b>SHC</b>              | miR-10a, miR-204, miR-219, miR-9                  |
| <b>SNAP25</b>           | miR-1, miR-128a, miR-130a, miR-153                |
| <b>YOTIAO</b>           | miR-133a                                          |

**Supplementary Table III Fractions of miRNA targets in the shortest paths of each cellular machine**

| <b>Cellular machines</b>  | <b>Shortest paths from receptors to output nodes of cellular machines</b> |                    |                            |                 |                            |
|---------------------------|---------------------------------------------------------------------------|--------------------|----------------------------|-----------------|----------------------------|
|                           | <b>Transcription</b>                                                      | <b>Translation</b> | <b>Secretion apparatus</b> | <b>Motility</b> | <b>Electrical response</b> |
| Number of nodes           | 220                                                                       | 160                | 180                        | 226             | 185                        |
| Number of targets         | 59                                                                        | 32                 | 35                         | 55              | 37                         |
| Fraction of miRNA targets | 0.268                                                                     | 0.200              | 0.194                      | 0.243           | 0.200                      |
| P value                   | 0.116                                                                     | 0.0008             | 0.0002                     | 0.009           | 0.0008                     |

Note: P values were given by comparing the fraction of miRNA targets in each cellular machine to the fraction of miRNA targets (0.294) in the network using randomization tests.

**Supplementary Table IV Effect of false positives and false negatives on the fractions of miRNA targets in different cellular locations**

|                                                 | <b>False Negatives<br/>–10% targets</b>    | <b>False Negatives<br/>–20% targets</b>    | <b>Natural</b>                             | <b>False Positives<br/>+10% targets</b>    | <b>False Positives<br/>+20% targets</b>    |
|-------------------------------------------------|--------------------------------------------|--------------------------------------------|--------------------------------------------|--------------------------------------------|--------------------------------------------|
| <b>Cellular Location</b>                        | <b>Fraction of miRNA targets (P value)</b> |
| <b>Whole Network</b>                            | 23.5%                                      | 26.5%                                      | 29.4 %                                     | 32.4%                                      | 35.4%                                      |
| <b>Ligands</b>                                  | 9.1% (0.003)                               | 9.1% (0.003)                               | 9.1% (0.004)                               | 9.1% (0.0006)                              | 15.2% (0.0006)                             |
| <b>Cell Surface Receptors</b>                   | 16.3% (0.006)                              | 15.0% (0.015)                              | 18.8% (0.016)                              | 23.8% (0.022)                              | 25% (0.010)                                |
| <b>Intracellular Central Signaling Proteins</b> | 27.6% (0.139)                              | 24.6% (0.131)                              | 31.2% (0.08)                               | 33.8% (0.111)                              | 37.3% (0.052)                              |
| <b>Nuclear Proteins</b>                         | 50.0% (0.0008)                             | 42.1% (0.003)                              | 50.0% (0.006)                              | 55.3% (0.001)                              | 52.6% (0.008)                              |

Note: The whole network nodes were sorted into four subgroups, as shown in the table. False positives and false negatives of miRNA targets were randomly added and the fractions of miRNA targets and P values were recalculated. P values were given by comparing the fractions of miRNA targets in an individual subgroup with the fraction of miRNA targets in whole network using randomization tests.

**Supplementary Table V Effect of false positives and false negatives on the fractions of miRNA targets in the downstream components of the high-link group and the low-link group of adaptors**

|                              | <b>False Negatives – 20% targets</b> | <b>False Negatives –10% targets</b> | <b>Natural</b>                   | <b>False Positives +10% targets</b> | <b>False Positives +20% targets</b> |
|------------------------------|--------------------------------------|-------------------------------------|----------------------------------|-------------------------------------|-------------------------------------|
| <b>Downstream components</b> | <b>Fraction of miRNA targets</b>     | <b>Fraction of miRNA targets</b>    | <b>Fraction of miRNA targets</b> | <b>Fraction of miRNA targets</b>    | <b>Fraction of miRNA targets</b>    |
| <b>High link</b>             | 31.5%                                | 31.5%                               | 36.1%                            | 38.0%                               | 43.5%                               |
| <b>Low link</b>              | 23.1%                                | 23.1%                               | 24.2%                            | 28.6%                               | 37.4%                               |
| <b>P value</b>               | 0.069                                | 0.057                               | 0.015                            | 0.042                               | 0.149                               |

Note: High-link group contains adaptors linking to more than four downstream components, while low-link group contains adaptors linking to four or less downstream components. False positives and false negatives of miRNA targets were randomly added and the fractions of miRNA targets and P values were recalculated.

**Supplementary Table VI Effect of false positives and false negatives on the relations between the abundance of positive links and the abundance of miRNA targets in network motifs.**

|                  | <b>False<br/>Negatives –<br/>20% targets</b> | <b>False Negatives<br/>–10% targets</b> | <b>Natural</b> | <b>False Positives<br/>+10% targets</b> | <b>False Positives<br/>+20% targets</b> |
|------------------|----------------------------------------------|-----------------------------------------|----------------|-----------------------------------------|-----------------------------------------|
| <b>P value 1</b> | 0.007                                        | 0.007                                   | 0.004          | 0.008                                   | 0.005                                   |
| <b>P value 2</b> | 0.018                                        | 0.018                                   | 0.010          | 0.006                                   | 0.010                                   |

Note: False positives and false negatives of miRNA targets were randomly added and the fractions of miRNA targets and P values were recalculated. P value 1 represents the significance of less-enrichment of positive links in the subgroups with 0 miRNA targets. P value 2 represents the significance of enrichment of positive links in the subgroups whose nodes are all miRNA targets. The number of positive links and ratio were given in Supplementary Text File S26.



**Supplementary Table VII Effect of false positives and false negatives on the fraction of miRNA targets of the common nodes that locate in the shortest paths of all five cellular machines**

|                                  | <b>False Negatives – 20% targets</b> | <b>False Negatives –10% targets</b> | <b>Natural</b> | <b>False Positives +10% targets</b> | <b>False Positives +20% targets</b> |
|----------------------------------|--------------------------------------|-------------------------------------|----------------|-------------------------------------|-------------------------------------|
| <b>Fraction of miRNA targets</b> | 14.3%                                | 14.3%                               | 14.3%          | 15.7%                               | 27.1%                               |
| <b>P value</b>                   | 0.020                                | 0.005                               | 0.0002         | 0.0005                              | 0.056                               |

Note: The P values were given by comparing the fraction of miRNA targets of the common nodes to that of miRNA targets in the network using randomization tests. False positives and false negatives of miRNA targets were randomly added. The fractions of miRNA targets and P values were recalculated.

**List of supporting data files and Java source code files\***

| <b>File name</b> | <b>Description</b>                                                                                                        |
|------------------|---------------------------------------------------------------------------------------------------------------------------|
| Text file S1     | List of network nodes                                                                                                     |
| Text file S2     | List of network links                                                                                                     |
| Text file S3     | Overlapped miRNA targets used in this study                                                                               |
| Text file S4     | Network nodes which are miRNA targets                                                                                     |
| Text file S5     | Network nodes which are not miRNA targets                                                                                 |
| Text file S6     | Pajek format text file that was used to visualize the network                                                             |
| Text file S7     | List of each subgroup (classified according to cellular locations) nodes                                                  |
| Text file S8     | Up- and down- stream components and link numbers for all the adaptors                                                     |
| Text file S9     | High-link group and low-link group of the downstream proteins for all the adaptors                                        |
| Text file S10    | Input file of Mfinder program used in this study                                                                          |
| Text file S11    | Summary information of 3-size motifs outputted by MFinder                                                                 |
| Text file S12    | List of 3-size motifs outputted by MFinder                                                                                |
| Text file S13    | Summary information of 4-size motifs outputted by MFinder                                                                 |
| Text file S14    | List of 4-size motifs outputted by MFinder                                                                                |
| Text file S15    | Common proteins of five cellular machine shortest paths                                                                   |
| Text file S16    | MiRNA targets of common proteins listed in Text file S15                                                                  |
| Text file S17    | List of ligands extracted from human genome                                                                               |
| Text file S18    | List of receptors extracted from human genome                                                                             |
| Text file S19    | List of TFs extracted from human genome                                                                                   |
| Text file S20    | List of signaling proteins from manually curated signaling pathways                                                       |
| Text file S21    | List of signaling TFs                                                                                                     |
| Text file S22    | MiRNA targets in intracellular signaling proteins                                                                         |
| Text file S23    | MiRNA targets in signaling TFs                                                                                            |
| Text file S24    | Number and size of the themes regulated by each miRNA                                                                     |
| Text file S25    | The statistical significance of the associations between cellular machines and the network themes regulated by each miRNA |

|               |                                                                                                                      |
|---------------|----------------------------------------------------------------------------------------------------------------------|
| Text file S26 | The number and ratio of positive links in each subgroup of motifs upon false positive and negative miRNA target data |
| Zip file S1   | MiRNA target and link information of 3-size motifs                                                                   |
| Zip file S2   | MiRNA target and link information of 4-size motifs                                                                   |
| Zip file S3   | Subgroup data (classified according to the number of miRNA targets) of 3-size motifs                                 |
| Zip file S4   | Subgroup data (classified according to the number of miRNA targets) of 4-size motifs                                 |
| Zip file S5   | Five cellular machine output node proteins                                                                           |
| Zip file S6   | Proteins (nodes) on the shortest paths (from receptors to the output nodes of each cellular machine)                 |
| Zip file S7   | Shortest path nodes without input and output nodes                                                                   |
| Java file S1  | Java source code used to map miRNA targets to the network                                                            |
| Java file S2  | Java source code used to classify motifs based on the number of miRNA targets                                        |
| Java file S3  | Java source code used to find shortest paths                                                                         |
| Java file S4  | Java source code used to perform randomization tests                                                                 |

\*All data and Java source files can be downloaded at <http://www.bri.nrc.ca/wang/mirna2.html>

## Supplementary Reference List

Ma'ayan A, Jenkins SL, Neves S, Hasseldine A, Grace E, Dubin-Thaler B, Eungdamrong NJ, Weng G, Ram PT, Rice JJ, Kershenbaum A, Stolovitzky GA, Blitzer RD, Iyengar R (2005) Formation of regulatory patterns during signal propagation in a Mammalian cellular network. *Science* 309: 1078-1083

Messina DN, Glasscock J, Gish W, Lovett M (2004) An ORFeome-based analysis of human transcription factor genes and the construction of a microarray to interrogate their expression. *Genome Res* 14: 2041-2047

Subramanian A, Tamayo P, Mootha VK, Mukherjee S, Ebert BL, Gillette MA, Paulovich A, Pomeroy SL, Golub TR, Lander ES, Mesirov JP (2005) Gene set enrichment analysis: a knowledge-based approach for interpreting genome-wide expression profiles. *Proc Natl Acad Sci U S A* 102: 15545-15550

Zhang LV, King OD, Wong SL, Goldberg DS, Tong AH, Lesage G, Andrews B, Bussey H, Boone C, Roth FP (2005) Motifs, themes and thematic maps of an integrated *Saccharomyces cerevisiae* interaction network. *J Biol* 4: 6
